# Supplementary material
Source: Springer Nature journal article supplement (https://www.springermedizin.de/resource/supplementary/13058_2011_2870_MOESM2_ESM.pdf/9702772)

## OS by Subtype

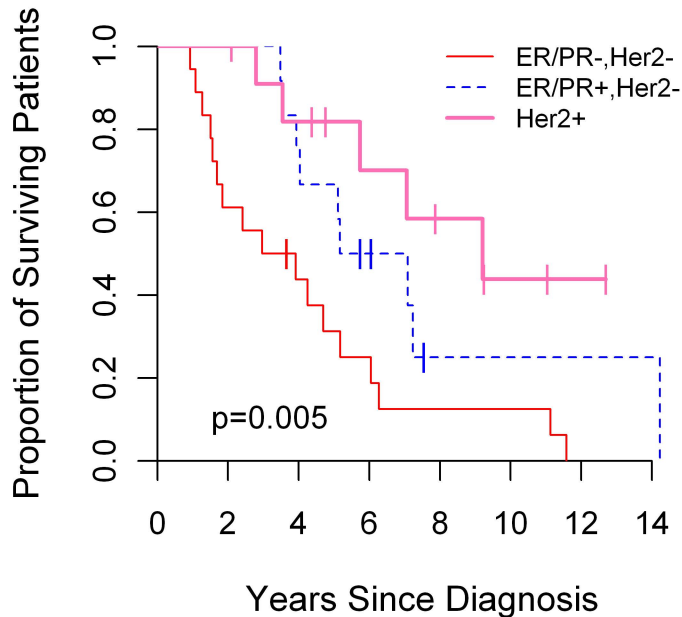

Supplement: MOESM2 [file 9702772]
